# Supplementary material for: Il consumo senza (più) meraviglia
Source: Royal Society of Chemistry journal article supplement (doi:10.1039/d0dt02778b), 2005-01-01
Supplement: d0dt02778b1.pdf [file d0dt02778b1.pdf]

## Supporting Information for

# Macrocycle supported dimetallic lanthanide complexes with slow magnetic relaxation in Dy<sub>2</sub> analogues

**Fu-Xing Shen,<sup>a,1</sup> Kuheli Pramanik,<sup>b,c,1</sup> Paula Brandão,<sup>d</sup> Yi-Quan Zhang,<sup>e</sup> Narayan Ch. Jana,<sup>b</sup> Xin-Yi Wang,<sup>a</sup> Anangamohan Panja<sup>b,c</sup>**

<sup>a</sup> State Key Laboratory of Coordination Chemistry, Collaborative Innovation Center of Advanced Microstructures, School of Chemistry and Chemical Engineering, Nanjing University, Nanjing, 210023, China. E-mail: wangxy66@nju.edu.cn

<sup>b</sup> Department of Chemistry, Panskura Banamali College, Panskura RS, WB 721152, India. E-mail: ampanja@yahoo.co.in

<sup>c</sup> Department of Chemistry, Gokhale Memorial Girls' College, 1/1 Harish Mukherjee Road, Kolkata 700020, India

<sup>d</sup> Department of Chemistry, CICECO-Aveiro Institute of Materials, University of Aveiro, 3810

<sup>e</sup> Jiangsu Key Laboratory for NSLSCS, School of Physical Science and Technology, Nanjing Normal University, Nanjing 210023, China

<sup>1</sup> These authors contributed equally to this work.

## Table of Content

|                                                                                                                                                                                                                                                                                           |    |
|-------------------------------------------------------------------------------------------------------------------------------------------------------------------------------------------------------------------------------------------------------------------------------------------|----|
| <b>Fig. S1.</b> $^1H$ NMR spectrum of the Schiff base ligand HL in $CDCl_3$ .                                                                                                                                                                                                             | 4  |
| <b>Fig. S2.</b> Experimental and simulated powder X-ray diffraction patterns for $1_{Dy}-6_{Ga}$ . The data were collected at room temperature. The good fit of the experimental and simulated patterns indicates the phase purity of these compounds.                                    | 5  |
| <b>Fig. S3.</b> Electrospray ionization mass spectrum (ESI-MS positive) of the Schiff base ligand in methanol (top) and its expanded view at bottom.                                                                                                                                      | 6  |
| <b>Fig. S4.</b> Electrospray ionization mass spectra (ESI-MS positive) of a reaction mixture recorded after 5 min (top) and 1 h (bottom) of mixing.                                                                                                                                       | 7  |
| <b>Scheme S1.</b> Probable mechanism for the <i>in-situ</i> transformation of the Schiff base leading to the macrocyclic ligand.                                                                                                                                                          | 8  |
| <b>Fig. S5.</b> Crystal packing of complexes $1_{Dy}$ and $4_{Dy}$ along the <i>a</i> axis. The numbers show the shortest Dy-Dy distances between the adjacent $Dy_2$ units.                                                                                                              | 9  |
| <b>Fig. S6.</b> The plot of $1/\chi_M$ versus T for $3_{Ga}$ (a) and $6_{Ga}$ (b), and the linear fit of Curie-Weiss law. The solid lines represent the best fits according to the Curie-Weiss law.                                                                                       | 9  |
| <b>Fig. S7.</b> Field dependent magnetization curves for compounds $1_{Dy}$ , $2_{Tb}$ , $4_{Dy}$ and $5_{Tb}$ at 2.0 K.                                                                                                                                                                  | 10 |
| <b>Fig. S8.</b> Frequency dependent in-phase ( $\chi'$ ) and out-of phase ( $\chi''$ ) signals of the ac susceptibility for $2_{Tb}$ under applied $H_{dc} = 0$ and 1 kOe.                                                                                                                | 10 |
| <b>Fig. S9.</b> Frequency dependent in-phase ( $\chi'$ ) and out-of phase ( $\chi''$ ) signals of the ac susceptibility for $5_{Tb}$ under applied $H_{dc} = 0$ and 1 kOe.                                                                                                                | 11 |
| <b>Fig. S10.</b> Temperature dependent in-phase ( $\chi'$ ) and out-of phase ( $\chi''$ ) signals of the ac susceptibility for $1_{Dy}$ and $4_{Dy}$ under zero dc field.                                                                                                                 | 11 |
| <b>Electrostatic model for <math>1_{Dy}</math> and <math>4_{Dy}</math></b>                                                                                                                                                                                                                | 12 |
| <b>Fig. S11.</b> Partial charges assigned to the formally charged ligands in complexes $1_{Dy}$ and $4_{Dy}$ .                                                                                                                                                                            | 12 |
| <b>Fig. S12.</b> Ground state magnetic anisotropy of complexes $1_{Dy}$ (a) and $4_{Dy}$ (b). The Green rods represent the orientations of the electrostatic anisotropy axes for each of the two $Dy^{III}$ ions in complexes $1_{Dy}$ and $4_{Dy}$ as calculated by electrostatic model. | 13 |
| <b>Table S1.</b> Selected bond lengths (Å) for complex $1_{Dy}-6_{Ga}$ .                                                                                                                                                                                                                  | 13 |
| <b>Table S2.</b> SHAPE analysis of the $Ln^{III}$ ion in complexes $1_{Dy}-6_{Ga}$ .                                                                                                                                                                                                      | 14 |
| <b>Table S3.</b> Relaxation fitting parameters from the least-square fitting of the Cole-Cole plots of $1_{Dy}$ under 2.0 K-7.0 K according to the generalized Debye model.                                                                                                               | 14 |
| <b>Table S4.</b> Relaxation fitting parameters from the least-square fitting of the Cole-Cole plots of $4_{Dy}$ under 2.0 K-10.0 K according to the generalized Debye model.                                                                                                              | 15 |
| <b>Table S5.</b> Parameters fitted from the Arrhenius plots considering multiple relaxation processes for $1_{Dy}$ and $4_{Dy}$ .                                                                                                                                                         | 15 |

|                                                                                                                                                                                                                                                                                                                                  |    |
|----------------------------------------------------------------------------------------------------------------------------------------------------------------------------------------------------------------------------------------------------------------------------------------------------------------------------------|----|
| <b>Computational details</b> .....                                                                                                                                                                                                                                                                                               | 16 |
| <b>Fig. S13.</b> Calculated complete structures of complexes <b>1<sub>Dy</sub></b> and <b>4<sub>Dy</sub></b> ; H atoms are omitted.....                                                                                                                                                                                          | 16 |
| <b>Table S6.</b> Calculated energy levels ( $\text{cm}^{-1}$ ), <b>g</b> ( $g_x, g_y, g_z$ ) tensors and predominant $m_J$ values of the lowest eight Kramers doublets (KDs) of individual Dy <sup>III</sup> fragments for complexes <b>1<sub>Dy</sub></b> and <b>4<sub>Dy</sub></b> using CASSCF/RASSI-SO with MOLCAS 8.4. .... | 17 |
| <b>Table S7.</b> Wave functions with definite projection of the total moment $ m_J\rangle$ for the lowest two KDs of individual Dy <sup>III</sup> fragments for complexes <b>1<sub>Dy</sub></b> and <b>4<sub>Dy</sub></b> . ....                                                                                                 | 18 |
| <b>Table S8.</b> Exchange energies $E$ ( $\text{cm}^{-1}$ ), the energy difference between each exchange doublets $\Delta_t$ ( $\text{cm}^{-1}$ ) and the main values of the $g_z$ for the lowest two exchange doublets of <b>1<sub>Dy</sub></b> and <b>4<sub>Dy</sub></b> . ....                                                | 19 |
| <b>Reference</b> .....                                                                                                                                                                                                                                                                                                           | 19 |

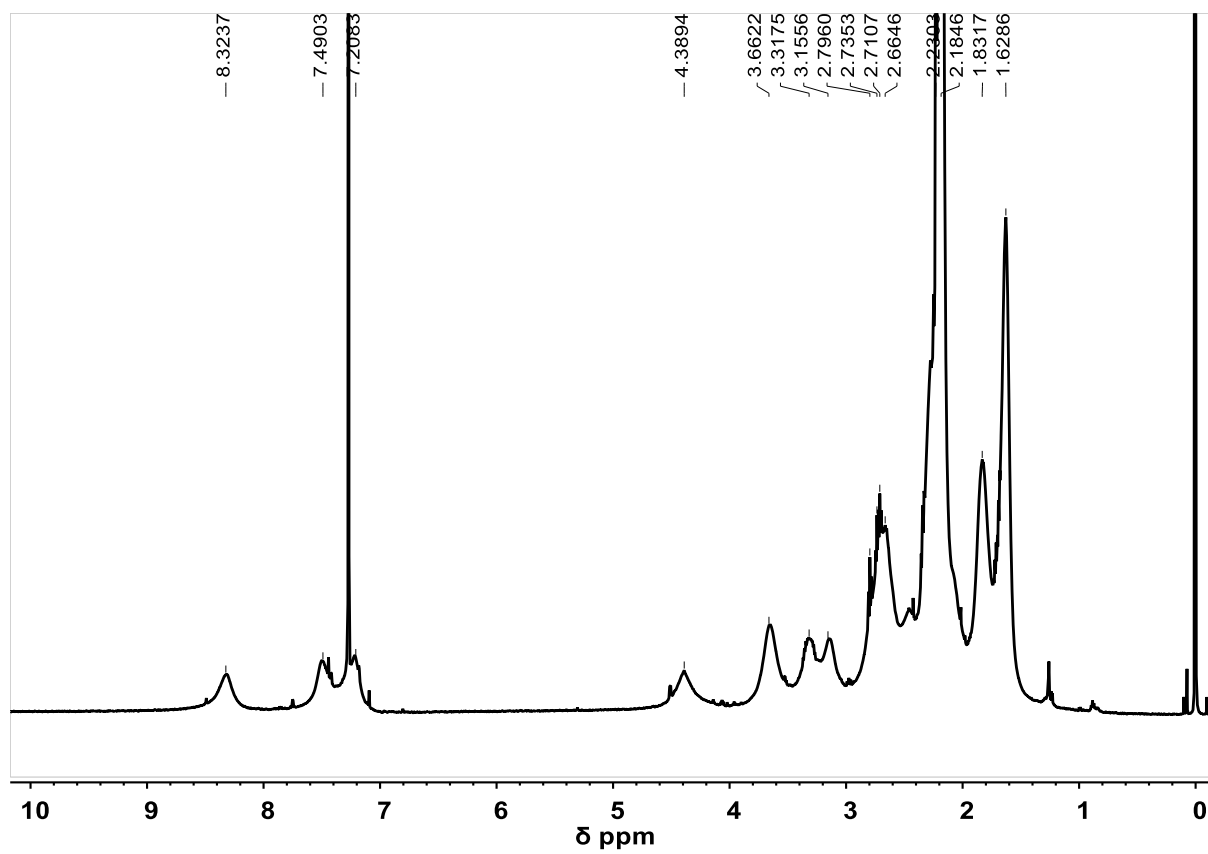

**Fig. S1.**  $^1\text{H}$  NMR spectrum of the Schiff base ligand HL in  $\text{CDCl}_3$ .

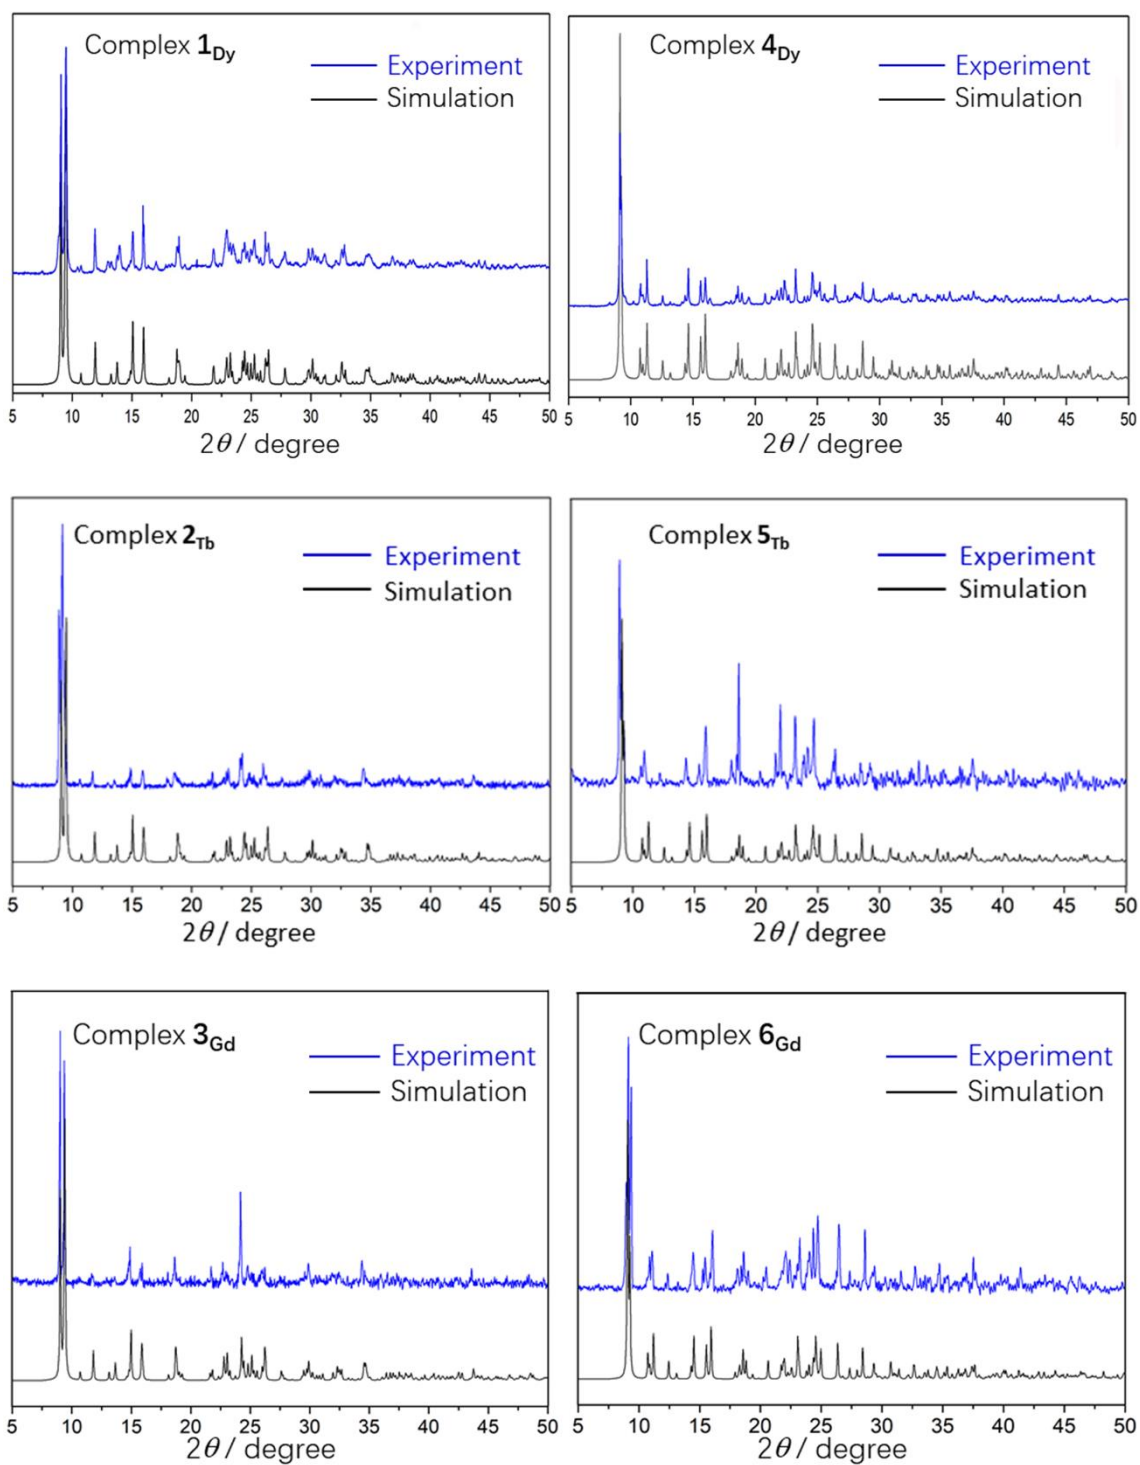

**Fig. S2.** Experimental and simulated powder X-ray diffraction patterns for  $1_{Dy}$ - $6_{Gd}$ . The data were collected at room temperature. The good fit of the experimental and simulated patterns indicates the phase purity of these compounds.

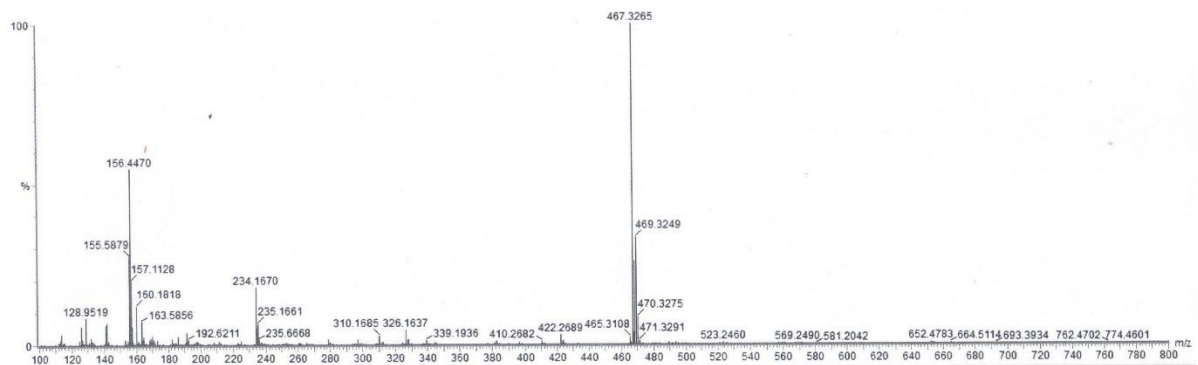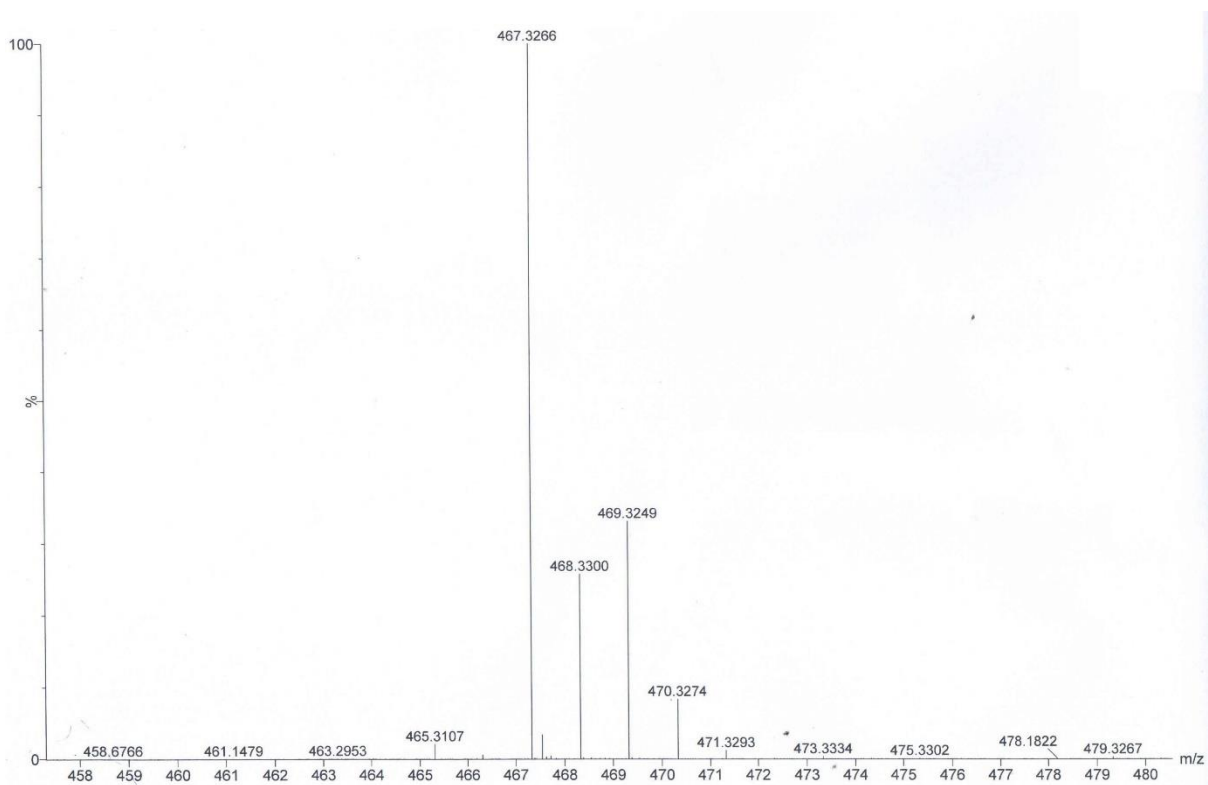

**Fig. S3.** Electrospray ionization mass spectrum (ESI-MS positive) of the Schiff base ligand in methanol (top) and its expanded view at bottom.

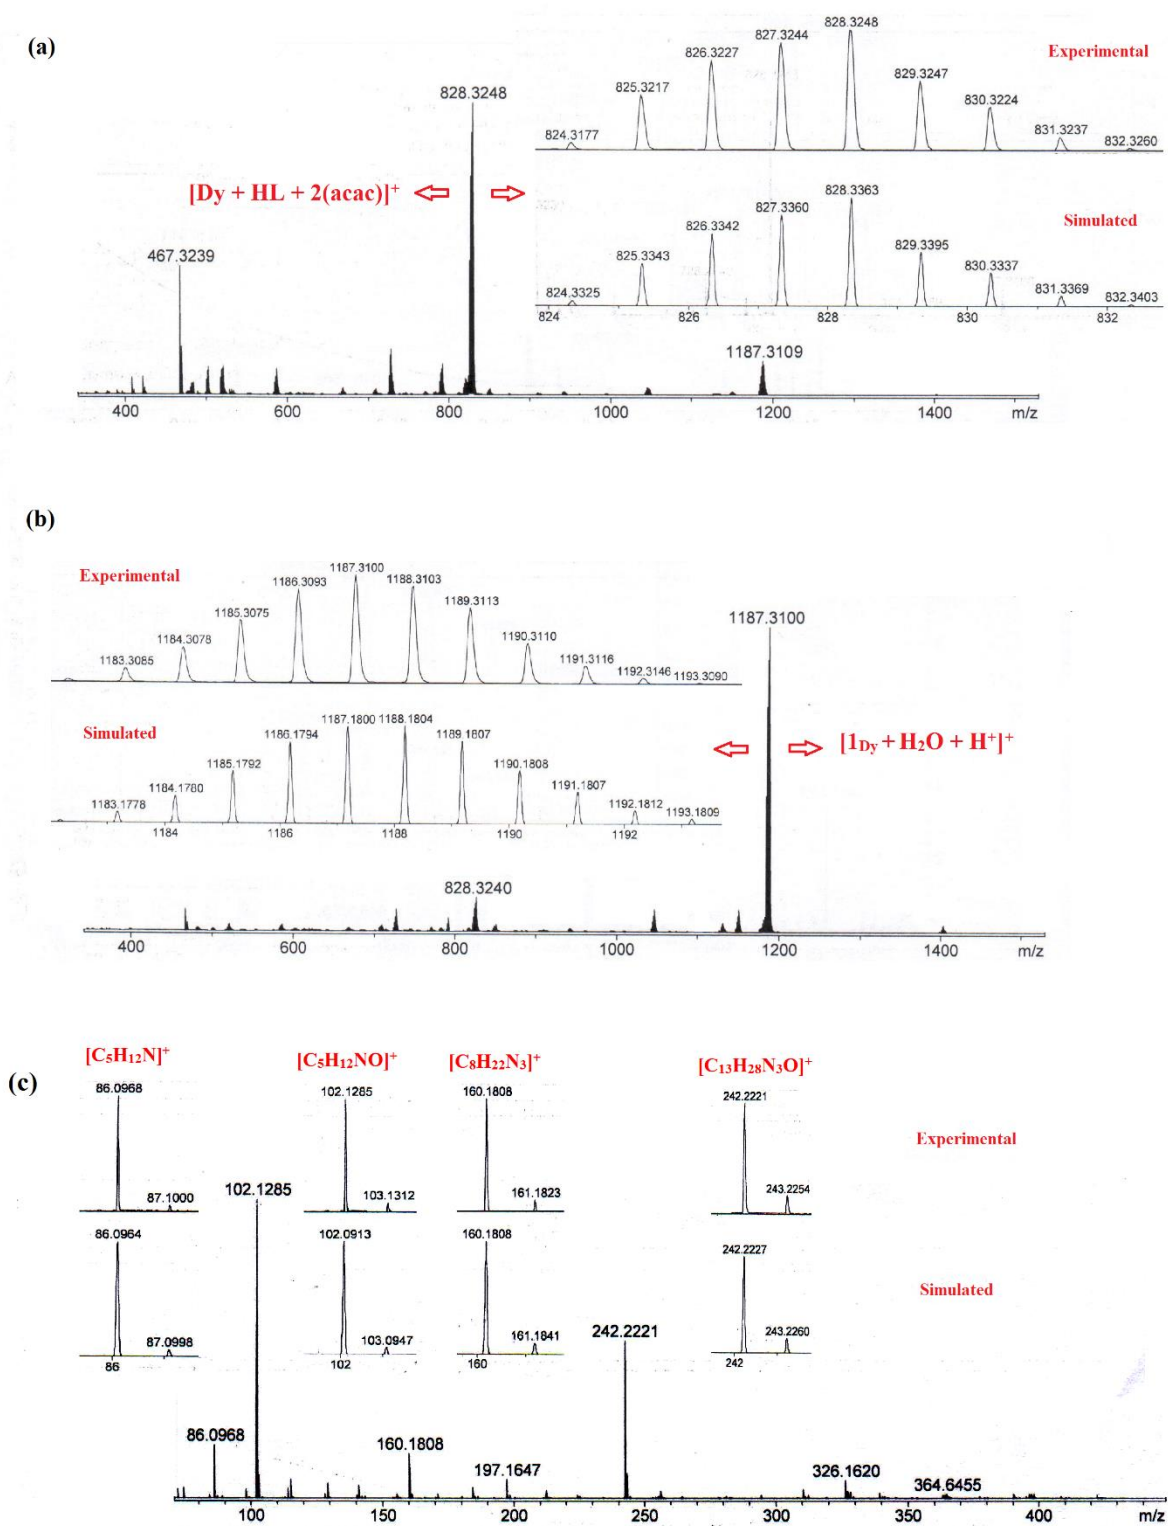

**Fig. S4.** Electrospray ionization mass spectra (ESI-MS positive) of a reaction mixture recorded after 5 min (top) and 1 h (bottom) of mixing.

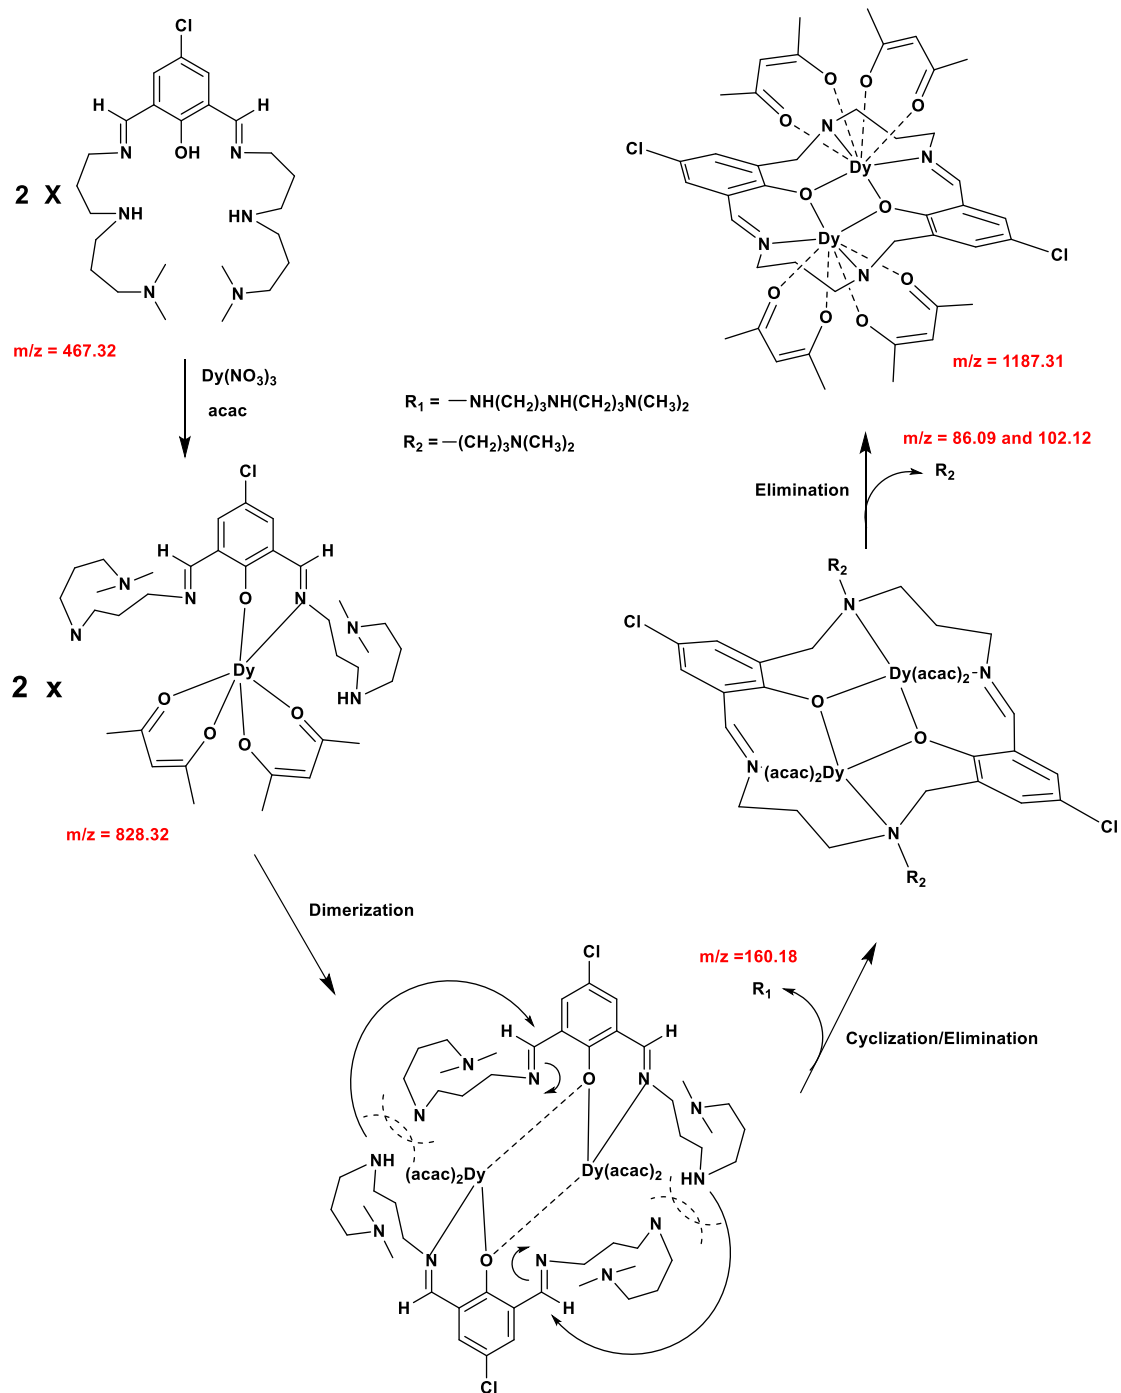

**Scheme S1.** Probable mechanism for the *in-situ* transformation of the Schiff base leading to the macrocyclic ligand.



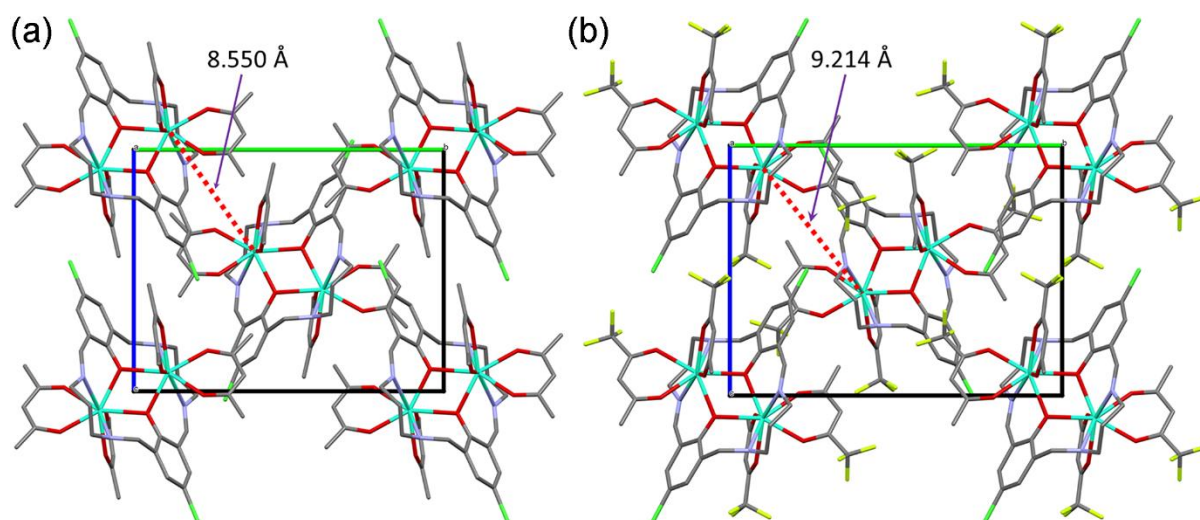

**Fig. S5.** Crystal packing of complexes **1<sub>Dy</sub>** and **4<sub>Dy</sub>** along the *a* axis. The numbers show the shortest Dy-Dy distances between the adjacent Dy<sub>2</sub> units.

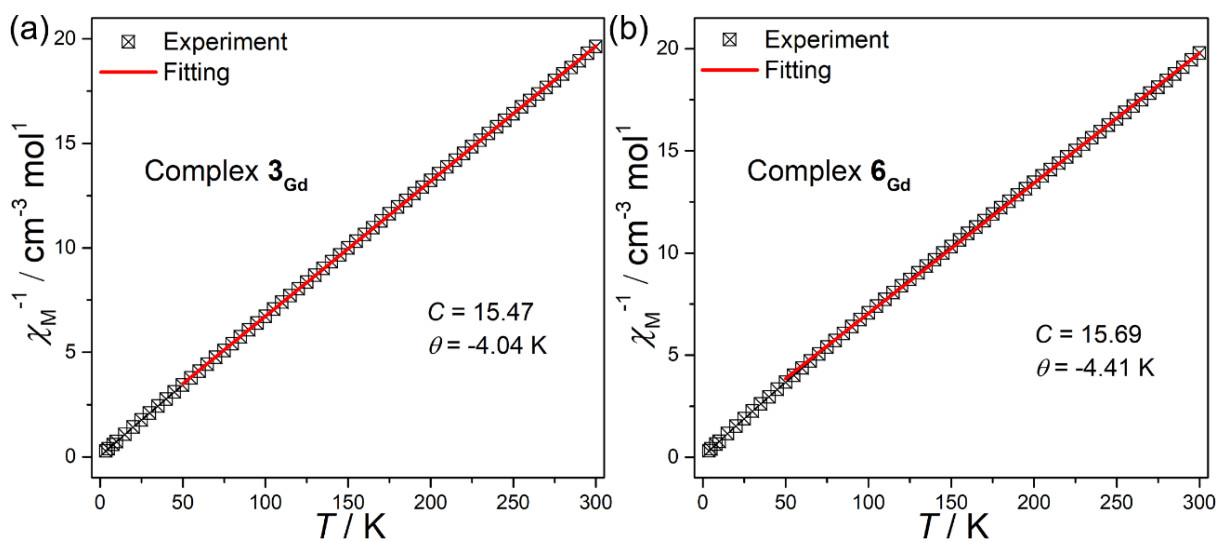

**Fig. S6.** The plot of  $1/\chi_M$  versus *T* for **3<sub>Gd</sub>** (a) and **6<sub>Gd</sub>** (b), and the linear fit of Curie-Weiss law. The solid lines represent the best fits according to the Curie-Weiss law.

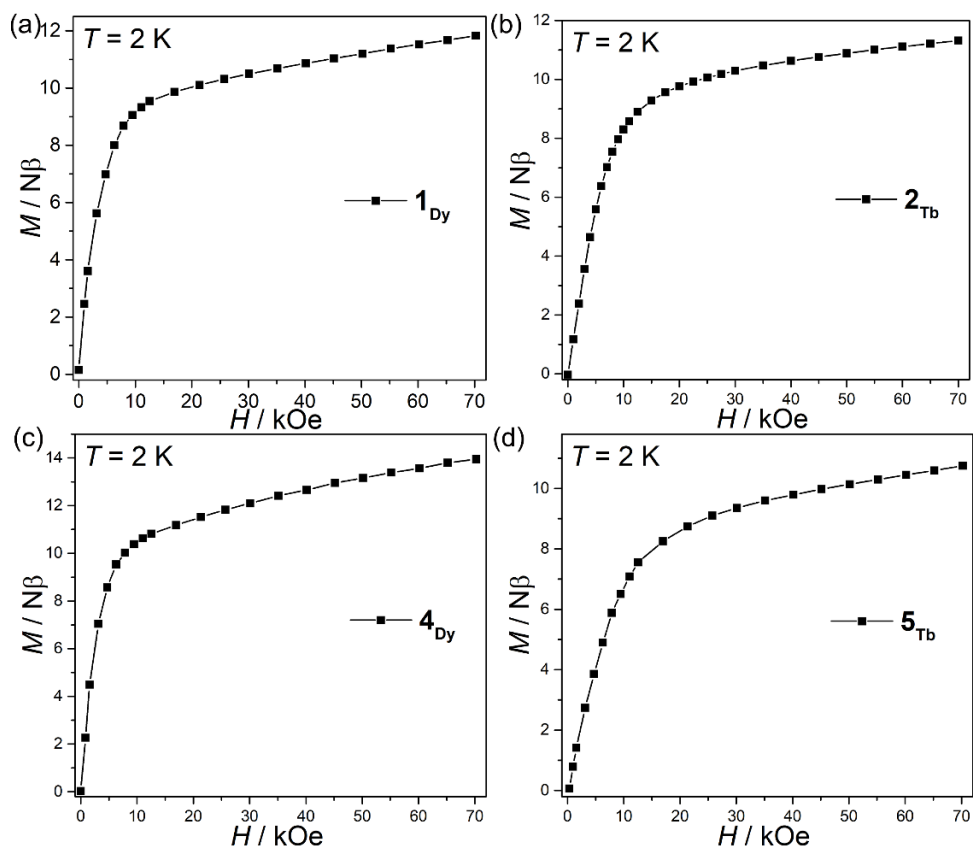

**Fig. S7.** Field dependent magnetization curves for compounds  $1_{Dy}$ ,  $2_{Tb}$ ,  $4_{Dy}$  and  $5_{Tb}$  at 2.0 K.

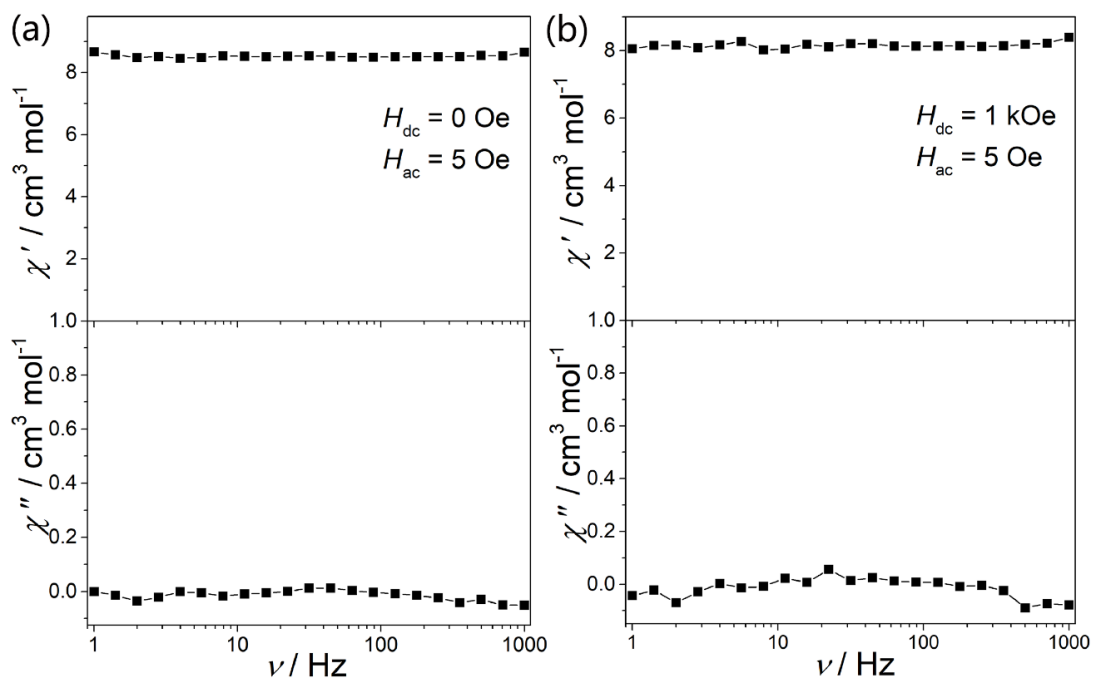

**Fig. S8.** Frequency dependent in-phase ( $\chi'$ ) and out-of phase ( $\chi''$ ) signals of the ac susceptibility for  $2_{Tb}$  under applied  $H_{dc} = 0$  and 1 kOe.

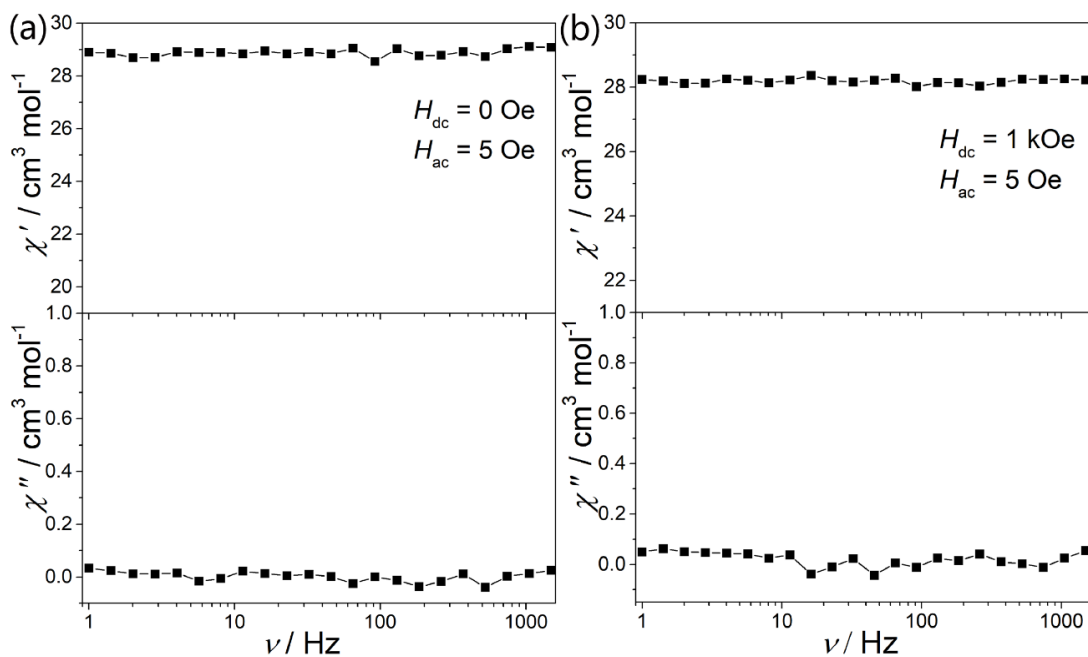

**Fig. S9.** Frequency dependent in-phase ( $\chi'$ ) and out-of phase ( $\chi''$ ) signals of the ac susceptibility for  $5Tb$  under applied  $H_{dc} = 0$  and 1 kOe.

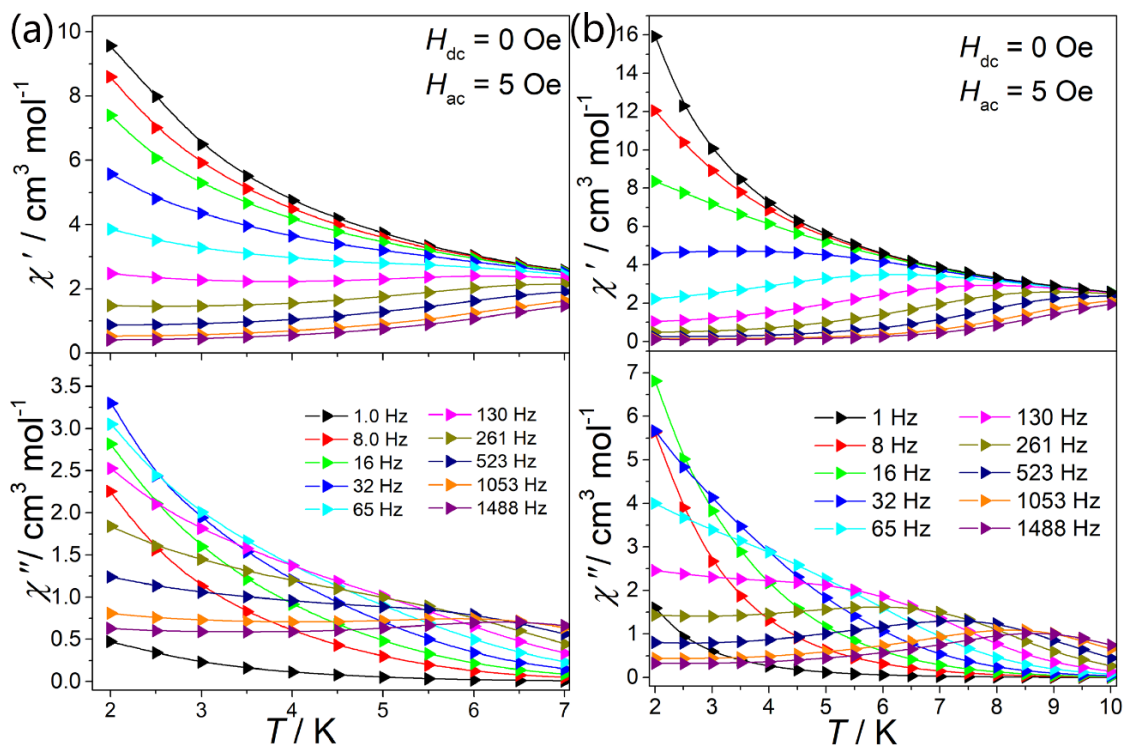

**Fig. S10.** Temperature dependent in-phase ( $\chi'$ ) and out-of phase ( $\chi''$ ) signals of the ac susceptibility for  $1Dy$  and  $4Dy$  under zero dc field.

## Electrostatic model for $1_{Dy}$ and $4_{Dy}$

**Electrostatic calculations.** The electrostatic calculations were performed on the complete monometallic structures using the X-Ray geometry with no optimization. The charge on the ligands is expected to have a dominant role in the determination of the electrostatic potential experienced by  $Dy^{III}$ , and thus, the electrostatic field produced by charge on the ligands could be calculated within a minimal valence bond model. Within this model, the charge is delocalized as a resonance hybrid that can be seen as a weighted sum of all “chemically stable” Lewis structures. The electrostatic calculations were implemented in a MAGELLAN program. This model does not take account different electron withdrawing or donating groups in the charged ligands. The partial charges assigned to the formally charged ligands in complexes  $1_{Dy}$  and  $4_{Dy}$  were shown in Fig. S11.

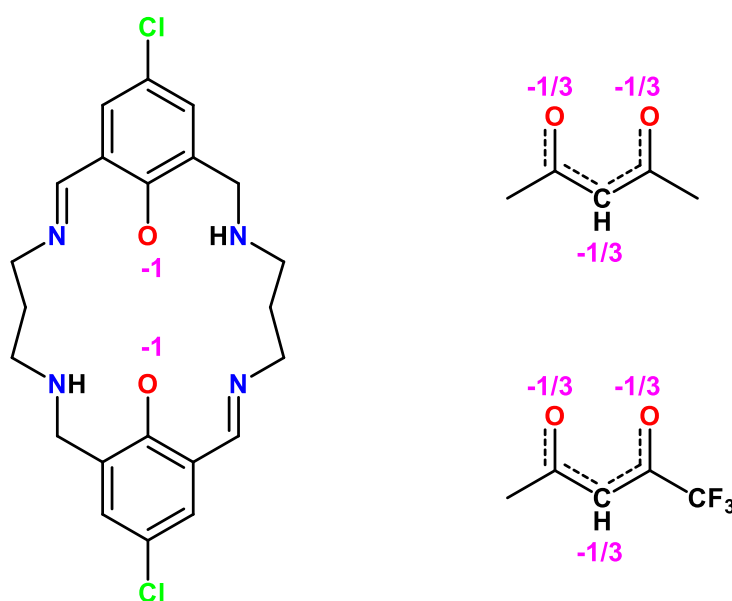

**Fig. S11.** Partial charges assigned to the formally charged ligands in complexes  $1_{Dy}$  and  $4_{Dy}$ .

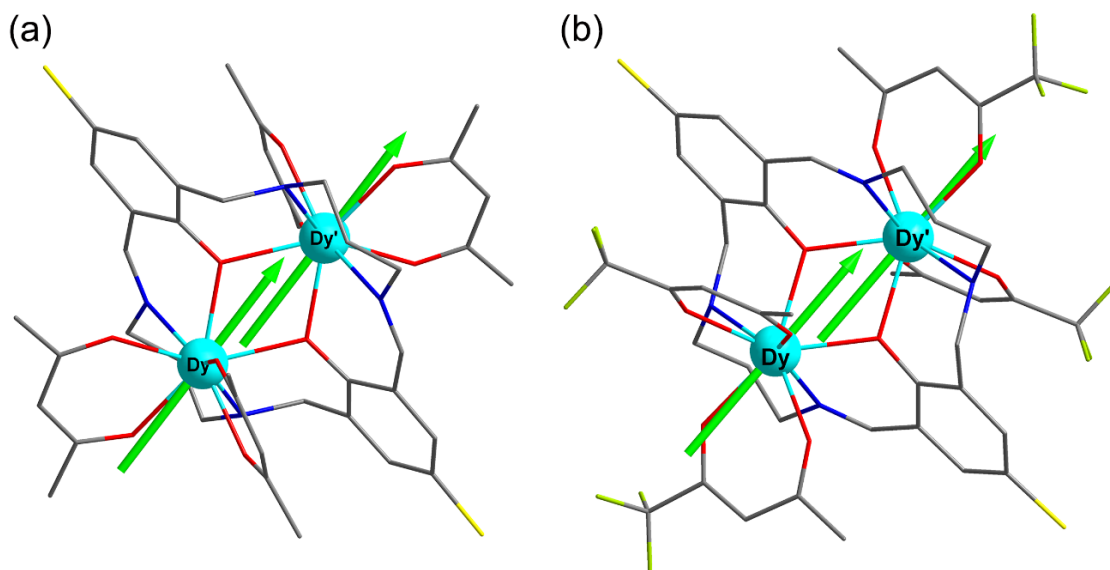

**Fig. S12.** Ground state magnetic anisotropy of complexes **1<sub>Dy</sub>** (a) and **4<sub>Dy</sub>** (b). The Green rods represent the orientations of the electrostatic anisotropy axes for each of the two Dy<sup>III</sup> ions in complexes **1<sub>Dy</sub>** and **4<sub>Dy</sub>** as calculated by electrostatic model.

**Table S1.** Selected bond lengths (Å) for complex **1<sub>Dy</sub>–6Ga**.

|          | <b>1<sub>Dy</sub></b> | <b>2<sub>Tb</sub></b> | <b>3<sub>Ga</sub></b> | <b>4<sub>Dy</sub></b> | <b>5<sub>Tb</sub></b> | <b>6<sub>Ga</sub></b> |
|----------|-----------------------|-----------------------|-----------------------|-----------------------|-----------------------|-----------------------|
| Ln–O1    | 2.302(2)              | 2.306(2)              | 2.327(2)              | 2.2990(19)            | 2.307(2)              | 2.328(2)              |
| Ln–O1'   | 2.371(2)              | 2.378(3)              | 2.405(2)              | 2.3402(19)            | 2.353(2)              | 2.381(2)              |
| Ln–O2    | 2.321(2)              | 2.309(2)              | 2.357(2)              | 2.335(2)              | 2.349(2)              | 2.377(2)              |
| Ln–O3    | 2.302(2)              | 2.330(2)              | 2.330(3)              | 2.324(2)              | 2.334(2)              | 2.358(2)              |
| Ln–O4    | 2.323(2)              | 2.320(3)              | 2.345(3)              | 2.341(2)              | 2.349(3)              | 2.374(2)              |
| Ln–O5    | 2.337(2)              | 2.338(3)              | 2.354(3)              | 2.364(2)              | 2.372(3)              | 2.393(2)              |
| Ln–N1    | 2.595(2)              | 2.601(3)              | 2.624(3)              | 2.573(2)              | 2.592(3)              | 2.608(2)              |
| Ln–N2    | 2.588(2)              | 2.593(3)              | 2.611(3)              | 2.564(2)              | 2.572(3)              | 2.595(2)              |
| Ln...Ln' | 3.891(1)              | 3.901(2)              | 3.939(1)              | 3.874(1)              | 3.895(1)              | 3.935(1)              |

**Table S2.** SHAPE analysis of the Ln<sup>III</sup> ion in complexes **1Dy–6Gd**.

| Label    | Shape                                      | Symmetry | <b>1Dy</b>   | <b>2Tb</b>   | <b>3Gd</b>   | <b>4Dy</b>   | <b>5Tb</b>   | <b>6Gd</b>   |
|----------|--------------------------------------------|----------|--------------|--------------|--------------|--------------|--------------|--------------|
| OP-8     | Octagon                                    | $D_{8h}$ | 29.655       | 29.746       | 29.967       | 29.614       | 29.667       | 29.812       |
| HPY-8    | Heptagonal pyramid                         | $C_{7v}$ | 23.089       | 22.981       | 22.916       | 23.103       | 23.084       | 22.967       |
| HBPY-8   | Hexagonal bipyramid                        | $D_{6h}$ | 15.228       | 15.228       | 15.136       | 15.982       | 15.928       | 15.768       |
| CU-8     | Cube                                       | $O_h$    | 9.516        | 9.474        | 9.373        | 9.645        | 9.562        | 9.415        |
| SAPR-8   | Square antiprism                           | $D_{4d}$ | <b>0.711</b> | <b>0.715</b> | <b>0.738</b> | <b>0.719</b> | <b>0.732</b> | <b>0.759</b> |
| TDD-8    | Triangular dodecahedron                    | $D_{2d}$ | 1.928        | 1.927        | 1.908        | 2.262        | 2.222        | 2.173        |
| JGBF-8   | Johnson gyrobifastigium J26                | $D_{2d}$ | 14.799       | 14.738       | 14.685       | 15.450       | 15.464       | 15.376       |
| JETBPY-8 | Johnson elongated triangular bipyramid J14 | $C_{3h}$ | 26.661       | 26.599       | 26.499       | 26.851       | 26.789       | 26.805       |
| JBTPR-8  | Biaugmented trigonal prism J50             | $C_{2v}$ | 2.858        | 2.850        | 2.889        | 2.686        | 2.706        | 2.687        |
| BTPR-8   | Biaugmented trigonal prism                 | $C_{2v}$ | 2.403        | 2.394        | 2.411        | 2.209        | 2.194        | 2.158        |
| JSD-8    | Snub diphenoid J84                         | $D_{2d}$ | 4.960        | 4.986        | 5.014        | 5.026        | 5.091        | 5.073        |
| TT-8     | Triakis tetrahedron                        | $T_d$    | 10.226       | 10.185       | 10.080       | 10.484       | 10.400       | 10.266       |
| ETBPY-8  | Elongated trigonal bipyramid               | $D_{3h}$ | 22.882       | 22.798       | 22.704       | 22.496       | 22.423       | 22.359       |

**Table S3.** Relaxation fitting parameters from the least-square fitting of the Cole-Cole plots of **1Dy** under 2.0 K-7.0 K according to the generalized Debye model.

| $T / K$ | $\chi_S / \text{cm}^3 \text{mol}^{-1} \text{K}$ | $\chi_T / \text{cm}^3 \text{mol}^{-1} \text{K}$ | $\tau / \text{s}$ | $\alpha$ | $R$     |
|---------|-------------------------------------------------|-------------------------------------------------|-------------------|----------|---------|
| 2.0     | 0.09772                                         | 10.3948                                         | 0.00421           | 0.27892  | 0.10645 |
| 2.5     | 0.11156                                         | 8.22078                                         | 0.00338           | 0.2899   | 0.09519 |
| 3.0     | 0.14739                                         | 6.72181                                         | 0.00265           | 0.29167  | 0.07716 |
| 3.5     | 0.17321                                         | 5.68125                                         | 0.0021            | 0.29922  | 0.06261 |
| 4.0     | 0.20167                                         | 4.88581                                         | 0.00162           | 0.30654  | 0.04711 |
| 4.5     | 0.23683                                         | 4.26460                                         | 0.0012            | 0.31286  | 0.0359  |
| 5.0     | 0.27400                                         | 3.78384                                         | 8.44849E-4        | 0.31827  | 0.0291  |
| 5.5     | 0.30472                                         | 3.3875                                          | 5.49351E-4        | 0.31964  | 0.01956 |
| 6.0     | 0.32661                                         | 3.07392                                         | 3.37829E-4        | 0.32397  | 0.01335 |
| 6.5     | 0.32983                                         | 2.80968                                         | 1.93784E-4        | 0.33039  | 0.00906 |
| 7.0     | 0.29719                                         | 2.59099                                         | 1.07626E-4        | 0.34125  | 0.00549 |

**Table S4.** Relaxation fitting parameters from the least-square fitting of the Cole-Cole plots of  $\mathbf{4D}_y$  under 2.0 K-10.0 K according to the generalized Debye model.

| $T / \text{K}$ | $\chi_S / \text{cm}^3\text{mol}^{-1}\text{K}$ | $\chi_T / \text{cm}^3\text{mol}^{-1}\text{K}$ | $\tau / \text{s}$ | $\alpha$ | $R$     |
|----------------|-----------------------------------------------|-----------------------------------------------|-------------------|----------|---------|
| 2.0            | 6.86965E-4                                    | 16.1494                                       | 0.00931           | 0.12744  | 0.32776 |
| 2.5            | 0.08033                                       | 12.5575                                       | 0.00705           | 0.11972  | 0.30968 |
| 3.0            | 0.06263                                       | 10.2857                                       | 0.00549           | 0.12471  | 0.10584 |
| 3.5            | 0.05662                                       | 8.59557                                       | 0.00426           | 0.12479  | 0.07755 |
| 4.0            | 0.05857                                       | 7.34936                                       | 0.0033            | 0.12304  | 0.06592 |
| 4.5            | 0.05897                                       | 6.38985                                       | 0.00253           | 0.12444  | 0.05484 |
| 5.0            | 0.06854                                       | 5.66259                                       | 0.00193           | 0.12219  | 0.04426 |
| 5.5            | 0.07805                                       | 5.10091                                       | 0.00149           | 0.12397  | 0.0393  |
| 6.0            | 0.09391                                       | 4.62589                                       | 0.00114           | 0.12211  | 0.03583 |
| 6.5            | 0.11715                                       | 4.21506                                       | 8.46843E-4        | 0.1233   | 0.02997 |
| 7.0            | 0.1517                                        | 3.86827                                       | 6.21474E-4        | 0.125    | 0.02964 |
| 7.5            | 0.18891                                       | 3.57869                                       | 4.43622E-4        | 0.13162  | 0.02116 |
| 8.0            | 0.2364                                        | 3.32169                                       | 3.06309E-4        | 0.13671  | 0.01664 |
| 8.5            | 0.31043                                       | 3.0887                                        | 2.0806E-4         | 0.1361   | 0.01211 |
| 9.0            | 0.37057                                       | 2.89992                                       | 1.38155E-4        | 0.14039  | 0.00727 |
| 9.5            | 0.50749                                       | 2.73676                                       | 9.7337E-5         | 0.1303   | 0.00577 |
| 10.0           | 0.66957                                       | 2.58259                                       | 6.95075E-5        | 0.11459  | 0.00329 |

**Table S5.** Parameters fitted from the Arrhenius plots considering multiple relaxation processes for  $\mathbf{1D}_y$  and  $\mathbf{4D}_y$ .

| Complex $\mathbf{1D}_y$ |                                |                    |        |
|-------------------------|--------------------------------|--------------------|--------|
|                         | Value                          | Standard error     | $R^2$  |
| $n$                     | 2.88                           | 0.15               | 0.9998 |
| $C$                     | 8.19                           | 1.91               |        |
| $\tau_{\text{QTM}}$     | 0.0056                         | $3 \times 10^{-4}$ |        |
| $\tau_0$                | $1.1 \times 10^{-8} \text{ s}$ | $3 \times 10^{-9}$ |        |
| $U_{\text{eff}}$        | 66.7 K                         | 2.4                |        |
| Complex $\mathbf{4D}_y$ |                                |                    |        |
| $n$                     | 2.86                           | 0.07               | 0.9998 |
| $C$                     | 4.40                           | 0.53               |        |
| $\tau_{\text{QTM}}$     | 0.013                          | $6 \times 10^{-4}$ |        |
| $\tau_0$                | $3.3 \times 10^{-8} \text{ s}$ | $6 \times 10^{-9}$ |        |
| $U_{\text{eff}}$        | 79.0 K                         | 1.8                |        |

## Computational details

Both of binuclear complexes **1<sub>Dy</sub>** and **4<sub>Dy</sub>** with central symmetrical structures have one type of magnetic center Dy<sup>III</sup> ion. Complete-active-space self-consistent field (CASSCF) calculations on individual Dy<sup>III</sup> fragments for **1<sub>Dy</sub>** and **4<sub>Dy</sub>** (see Figure S13 for the calculated complete structures of **1<sub>Dy</sub>** and **4<sub>Dy</sub>**) on the basis of single-crystal X-ray determined geometry have been carried out with MOLCAS 8.4<sup>S1</sup> program package. Each individual Dy<sup>III</sup> fragment in **1<sub>Dy</sub>** and **4<sub>Dy</sub>** was calculated keeping the experimentally determined structure of the corresponding compound while replacing the neighboring Dy<sup>III</sup> ion by diamagnetic Lu<sup>III</sup>.

The basis sets for all atoms are atomic natural orbitals from the MOLCAS ANO-RCC library: ANO-RCC-VTZP for Dy<sup>III</sup>; VTZ for close N and O; VDZ for distant atoms. The calculations employed the second order Douglas-Kroll-Hess Hamiltonian, where scalar relativistic contractions were taken into account in the basis set and the spin-orbit couplings were handled separately in the restricted active space state interaction (RASSI-SO) procedure. Active electrons in 7 active spaces include all *f* electrons (CAS(9 in 7) in the CASSCF calculation. To exclude all the doubts, we calculated all the roots in the active space. We have mixed the maximum number of spin-free state which was possible with our hardware (all from 21 sextets, 128 from 224 quadruplets, 130 from 490 doublets for Dy<sup>II</sup>). SINGLE\_ANISO<sup>S2</sup> program was used to obtain the energy levels, *g* tensors, magnetic axes, *et al.*, based on the above CASSCF/RASSI-SO calculations.

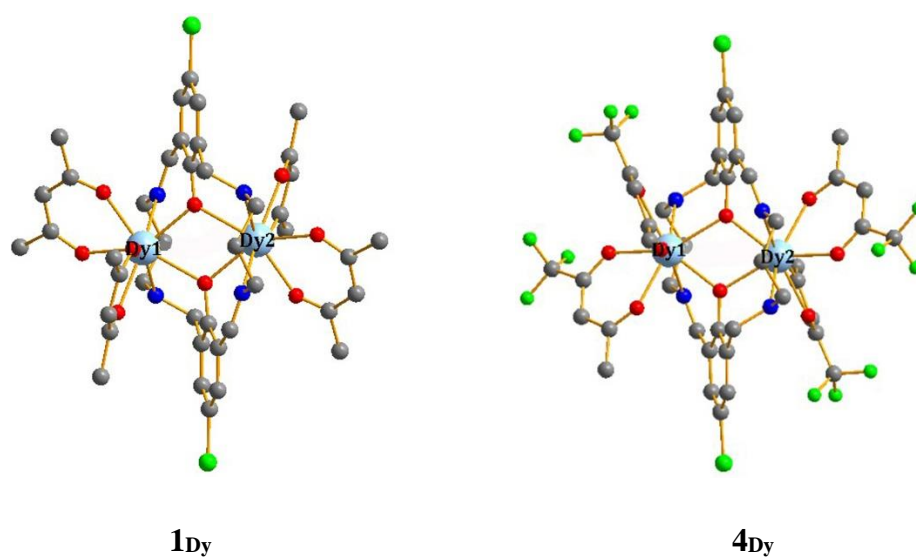

**Fig. S13.** Calculated complete structures of complexes **1<sub>Dy</sub>** and **4<sub>Dy</sub>**; H atoms are omitted.



**Table S6.** Calculated energy levels ( $\text{cm}^{-1}$ ),  $\mathbf{g}$  ( $g_x, g_y, g_z$ ) tensors and predominant  $m_J$  values of the lowest eight Kramers doublets (KDs) of individual  $\text{Dy}^{\text{III}}$  fragments for complexes **1Dy** and **4Dy** using CASSCF/RASSI-SO with MOLCAS 8.4.

| KDs | <b>1Dy</b>         |                          |            | <b>4Dy</b>         |                          |            |
|-----|--------------------|--------------------------|------------|--------------------|--------------------------|------------|
|     | $E/\text{cm}^{-1}$ | $\mathbf{g}$             | $m_J$      | $E/\text{cm}^{-1}$ | $\mathbf{g}$             | $m_J$      |
| 1   | 0.0                | 0.017<br>0.034<br>19.159 | $\pm 15/2$ | 0.0                | 0.005<br>0.009<br>19.498 | $\pm 15/2$ |
| 2   | 96.9               | 0.245<br>0.305<br>15.736 | $\pm 13/2$ | 143.1              | 0.146<br>0.240<br>15.964 | $\pm 13/2$ |
| 3   | 175.1              | 0.177<br>0.604<br>12.802 | $\pm 11/2$ | 224.4              | 0.561<br>0.785<br>13.214 | $\pm 11/2$ |
| 4   | 231.5              | 2.316<br>2.776<br>9.962  | $\pm 7/2$  | 304.5              | 0.946<br>2.062<br>10.678 | $\pm 9/2$  |
| 5   | 272.0              | 8.496<br>6.080<br>3.486  | $\pm 3/2$  | 378.2              | 0.122<br>3.616<br>7.278  | $\pm 5/2$  |

|   |       |                          |           |       |                          |           |
|---|-------|--------------------------|-----------|-------|--------------------------|-----------|
| 6 | 313.3 | 1.500<br>2.107<br>14.679 | $\pm 1/2$ | 430.3 | 9.628<br>7.452<br>3.313  | $\pm 1/2$ |
| 7 | 355.0 | 0.358<br>1.043<br>18.087 | $\pm 5/2$ | 490.1 | 0.520<br>1.273<br>18.407 | $\pm 3/2$ |
| 8 | 491.4 | 0.004<br>0.008<br>19.753 | $\pm 9/2$ | 591.0 | 0.015<br>0.020<br>19.775 | $\pm 7/2$ |

**Table S7.** Wave functions with definite projection of the total moment  $|m_J\rangle$  for the lowest two KDs of individual Dy<sup>III</sup> fragments for complexes **1<sub>Dy</sub>** and **4<sub>Dy</sub>**.

|                       | $E/\text{cm}^{-1}$ | wave functions                                    |
|-----------------------|--------------------|---------------------------------------------------|
| <b>1<sub>Dy</sub></b> | 0.0                | 88.3% $ \pm 15/2\rangle$ +8.0% $ \pm 11/2\rangle$ |
|                       | 96.9               | 72.5% $ \pm 13/2\rangle$ +18.0% $ \pm 9/2\rangle$ |
| <b>4<sub>Dy</sub></b> | 0.0                | 93.7% $ \pm 15/2\rangle$                          |
|                       | 143.1              | 68.5% $ \pm 13/2\rangle$ +21.9% $ \pm 9/2\rangle$ |

To fit the exchange interactions in complexes **1<sub>Dy</sub>** and **4<sub>Dy</sub>**, we took two steps to obtain them. Firstly, we calculated individual Dy<sup>III</sup> fragments using CASSCF/RASSI-SO to obtain the corresponding magnetic properties. Then, the exchange interactions between the magnetic centers were considered within the Lines model,<sup>S3</sup> while the account of the dipole-dipole magnetic couplings were treated exactly. The Lines model is effective and has been successfully used widely in the research field of *d* and *f*-elements single-molecule magnets.<sup>S4</sup>

For complexes **1<sub>Dy</sub>** and **4<sub>Dy</sub>**, there is only one type of  $\tilde{J}_1$ .

The Ising exchange Hamiltonian is:

$$\hat{H}_{exch} = -\tilde{J} \hat{S}_{Dy1}^z \hat{S}_{Dy2}^z \quad (1)$$

The  $\tilde{J}_{total}$  is the parameter of the total magnetic interaction ( $\tilde{J}_{total} = \tilde{J}_{dip} + \tilde{J}_{exch}$ ) between magnetic center ions. The  $\tilde{S}_{Dy} = 1/2$  is the ground pseudospin on the Dy<sup>III</sup> site. The dipolar magnetic coupling can be calculated exactly, while the exchange coupling constant was fitted through comparison of the computed and measured magnetic susceptibilities using the POLY\_ANISO program.<sup>S2</sup>

**Table S8.** Exchange energies  $E$  (cm<sup>-1</sup>), the energy difference between each exchange doublets  $\Delta_t$  (cm<sup>-1</sup>) and the main values of the  $g_z$  for the lowest two exchange doublets of **1Dy** and **4Dy**.

|            | <b>1Dy</b> |                       |        | <b>4Dy</b> |                       |        |
|------------|------------|-----------------------|--------|------------|-----------------------|--------|
|            | $E$        | $\Delta_t$            | $g_z$  | $E$        | $\Delta_t$            | $g_z$  |
| <b>1Dy</b> | 0.00       | $0.72 \times 10^{-5}$ | 38.318 | 0.00       | $0.34 \times 10^{-6}$ | 38.997 |
| <b>4Dy</b> | 1.29       | $0.12 \times 10^{-4}$ | 0.000  | 1.86       | $0.62 \times 10^{-6}$ | 0.000  |

## Reference

- S1 F. Aquilante, J. Autschbach, R. K. Carlson, L. F. Chibotaru, M. G. Delcey, L. De Vico, I. Fdez. Galván, N. Ferré, L. M. Frutos, L. Gagliardi, M. Garavelli, A. Giussani, C. E. Hoyer, G. Li Manni, H. Lischka, D. Ma, P. Å. Malmqvist, T. Müller, A. Nenov, M. Olivucci, T. B. Pedersen, D. Peng, F. Plasser, B. Pritchard, M. Reiher, I. Rivalta, I. Schapiro, J. Segarra-Martí, M. Stenrup, D. G. Truhlar, L. Ungur, A. Valentini, S. Vancoillie, V. Veryazov, V. P. Vysotskiy, O. Weingart, F. Zapata and R. Lindh, MOLCAS 8: New Capabilities for Multiconfigurational Quantum Chemical Calculations across the Periodic Table, *J. Comput. Chem.*, 2016, **37**, 506.
- S2 (a) L. F. Chibotaru, L. Ungur and A. Soncini, *Angew. Chem. Int. Ed.*, 2008, **47**, 4126; (b) L. Ungur, W. Van den Heuvel and L. F. Chibotaru, *New J. Chem.*, 2009, **33**, 1224; (c) L. F. Chibotaru, L. Ungur, C. Aronica, H. Elmoll, G. Pilet and D. Luneau, *J. Am. Chem. Soc.*, 2008, **130**, 12445.

- s3 M. E. Lines, *J. Chem. Phys.* 1971, **55**, 2977.
- s4 (a) K. C. Mondal, A. Sundt, Y. H. Lan, G. E. Kostakis, O. Waldmann, L. Ungur, L. F. Chibotaru, C. E. Anson and A. K. Powell, *Angew. Chem. Int. Ed.* 2012, **51**, 7550; (b) S. K. Langley, D. P. Wielechowski, V. Vieru, N. F. Chilton, B. Moubaraki, B. F. Abrahams, L. F. Chibotaru and K. S. Murray, *Angew. Chem. Int. Ed.* 2013, **52**, 12014.
